# Supplementary material
Source: PubMed Central journal article supplement (PMC4886558)

# Supplemental Figure 1

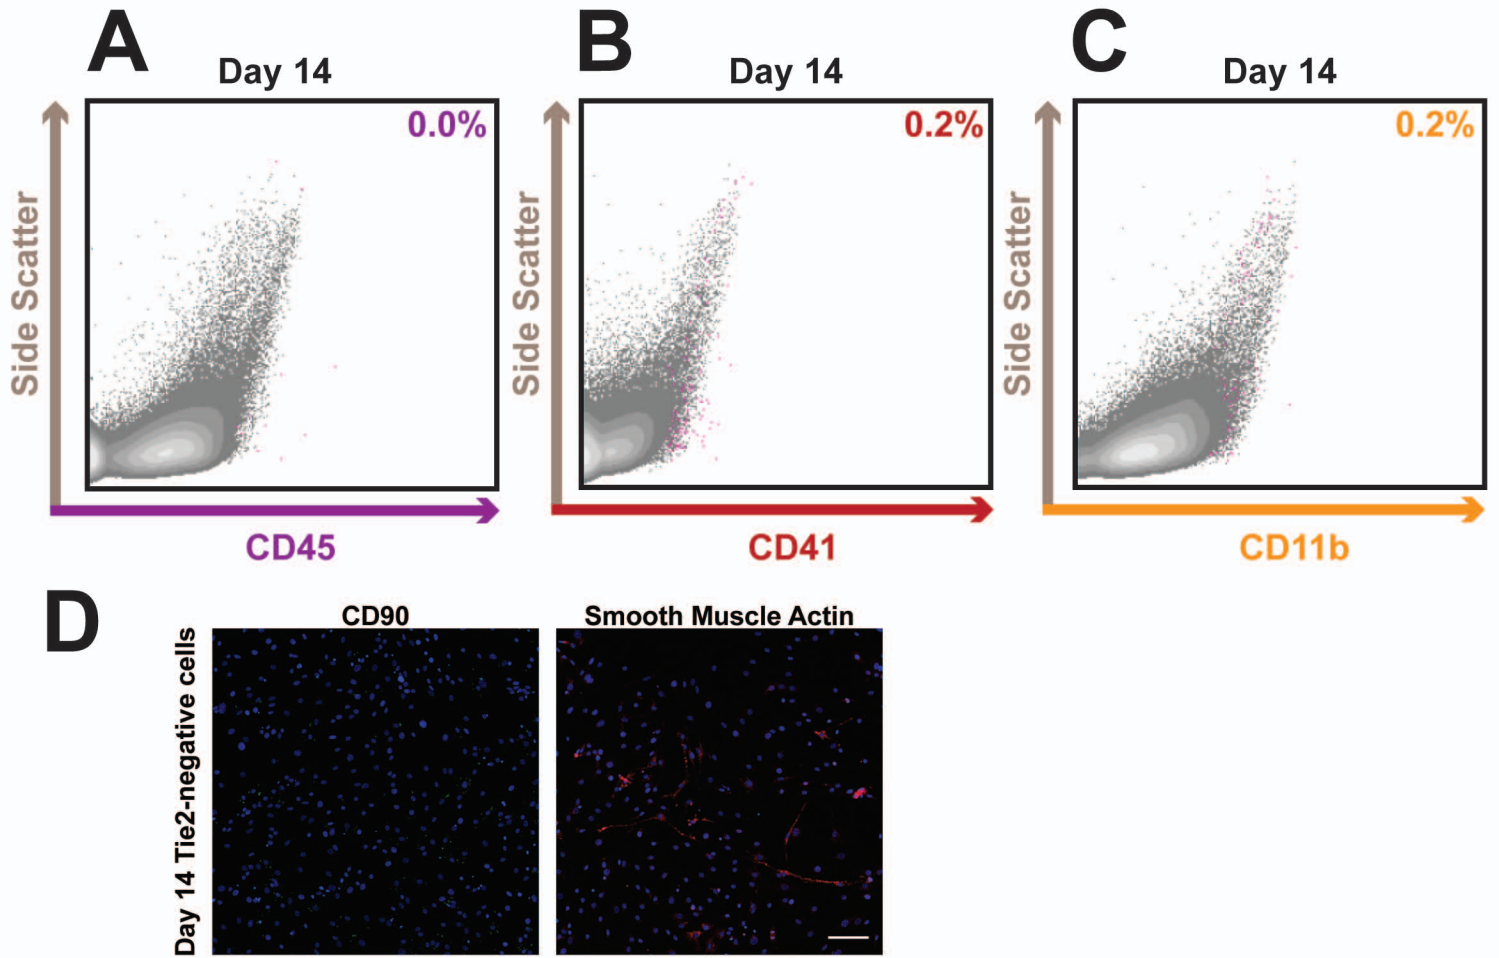

# Supplemental Figure 2

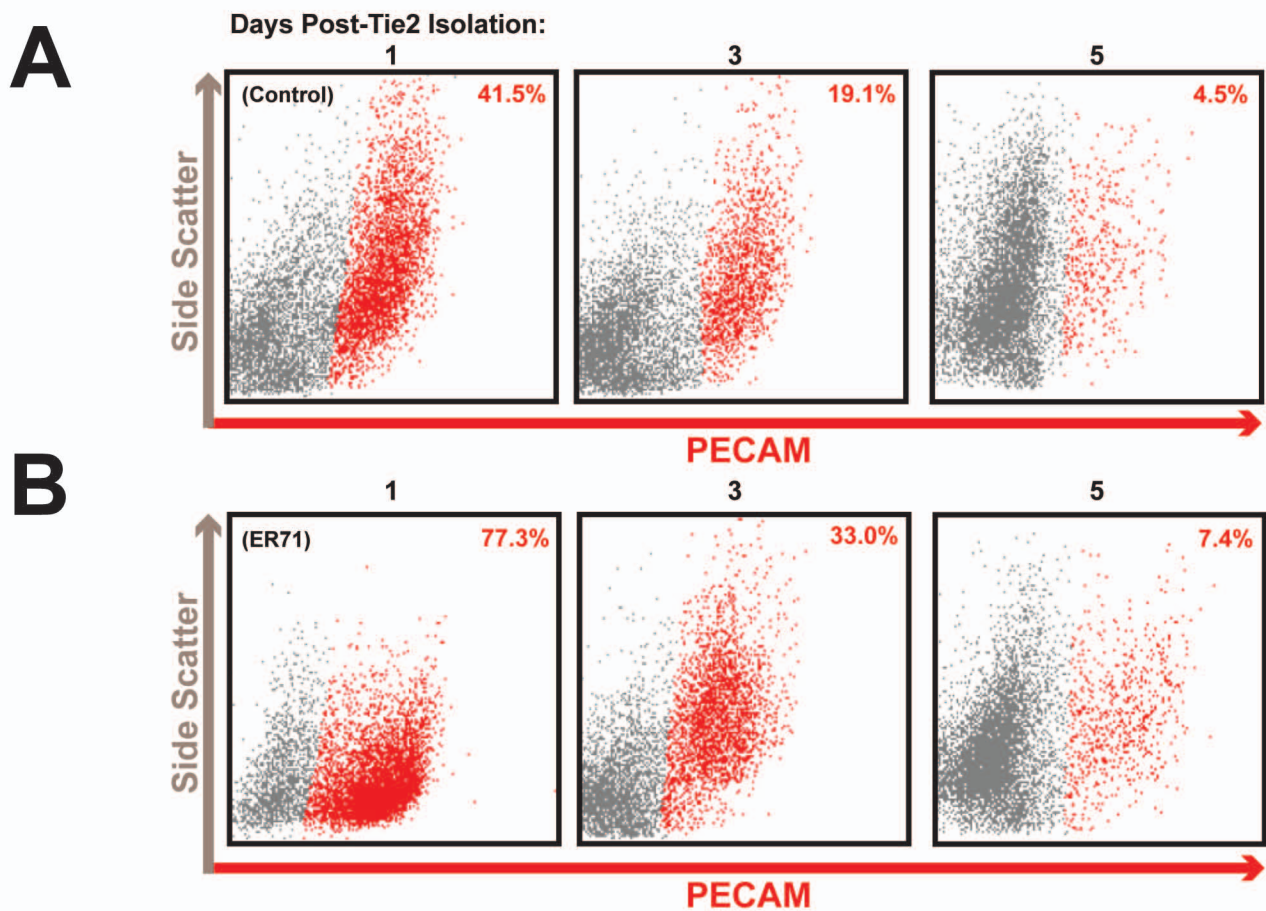

# Supplemental Figure 3

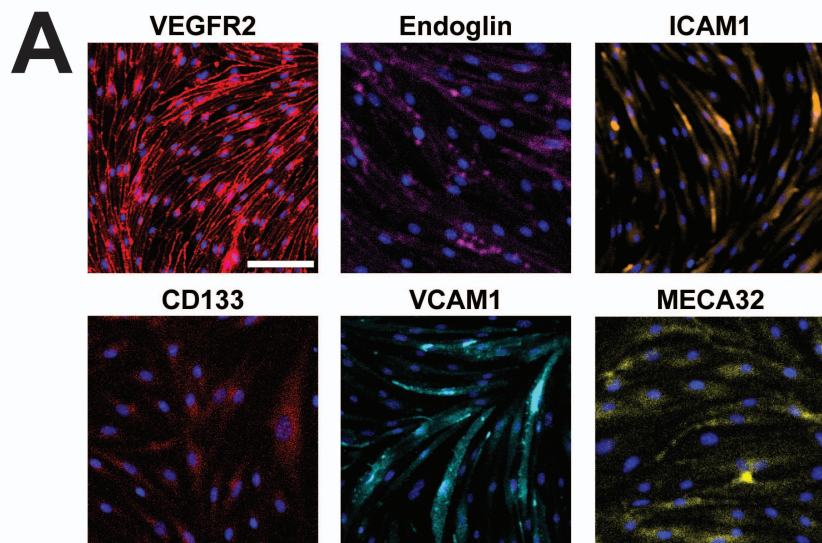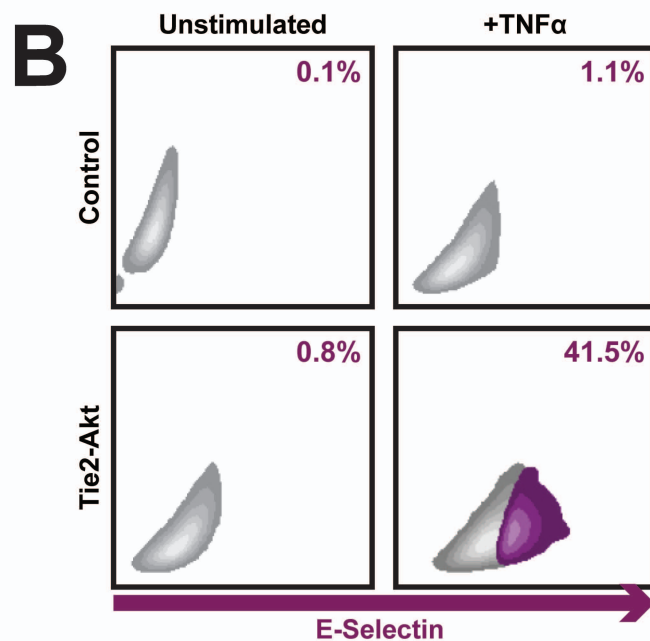

# Supplemental Figure 4

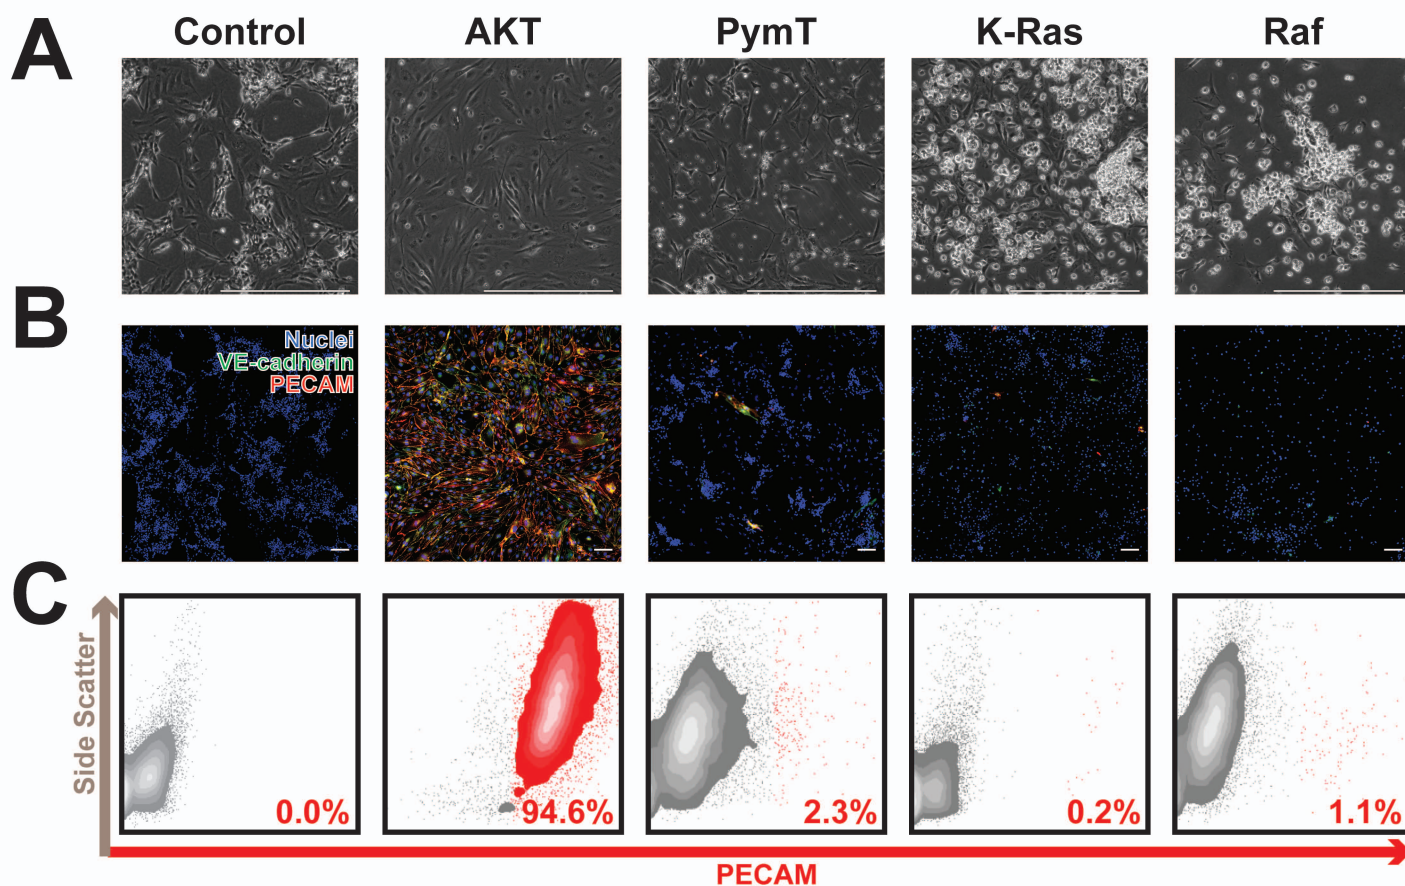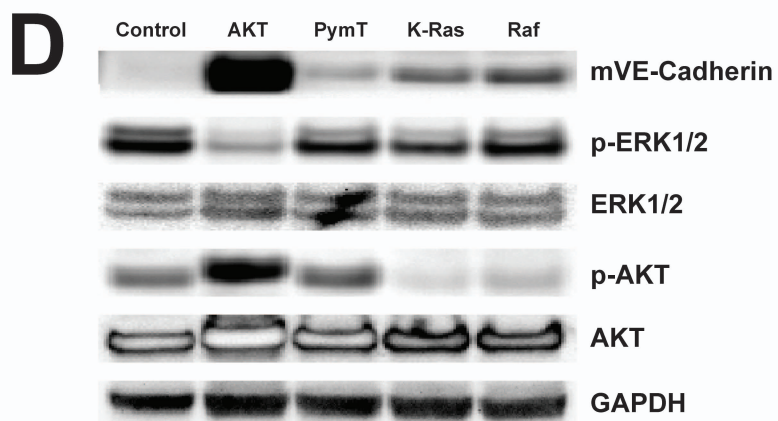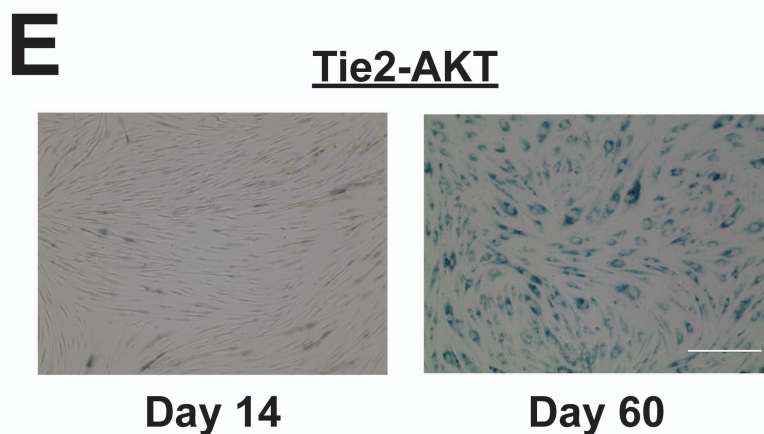

# Supplemental Figure 5

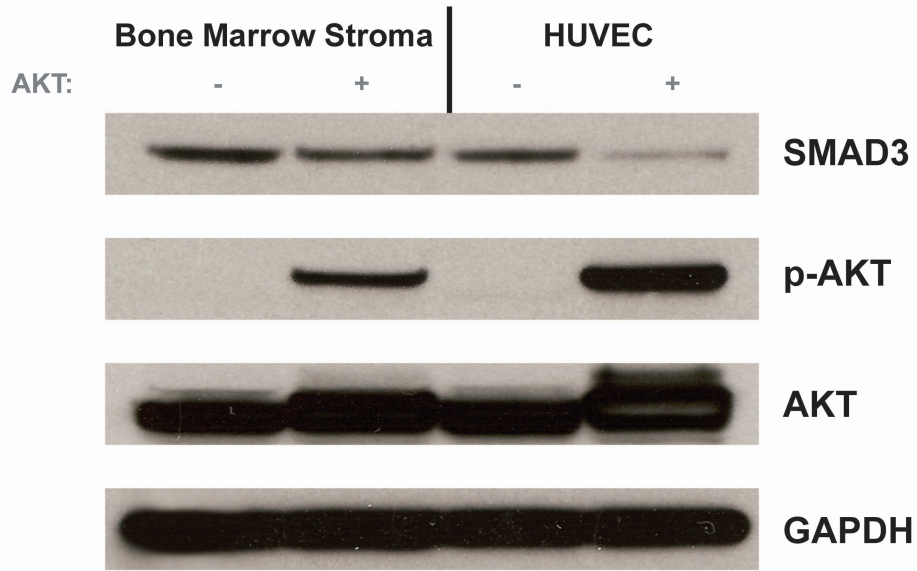

Supplement: NIHMS789088-supplement-Supplemental_Figure.pdf [file NIHMS789088-supplement-Supplemental_Figure.pdf]
